# Supplementary material for: Influence of inter- and intramolecular H-bonding on the mesomorphic and photoswitching behaviour of (E)-4-((4-(hexyloxy)phenyl)diazenyl)-N-phenyl benzamides
Source: RSC Adv. 2020 May 27;10(34):20222–30. doi: 10.1039/d0ra03024d (PMC9054115; doi:10.1039/d0ra03024d)
Supplement: RA-010-D0RA03024D-s001 [file RA-010-D0RA03024D-s001.pdf]

## Supplementary information

### Influence of inter- and intramolecular H-bonding on the mesomorphic and photoswitching behaviour of (*E*)-4-((4-(hexyloxy) phenyl) diazenyl)-*N*-phenyl benzamides

Sunil B N,<sup>a,b</sup> Paresh Kumar Behera,<sup>c</sup> Ammathnadu S. Achalkumar,<sup>c</sup> G. Shanker<sup>d</sup> and Gurumurthy Hegde,<sup>\*a</sup>

#### Contents

1. UV-Vis spectra
2. FT-IR spectra of inter- and intramolecular H-bonding
3. FT-IR and <sup>1</sup>H NMR spectra

**1. UV-Vis spectra:** Fig. S1 and S2 shows time dependent absorption spectra during UV illumination and thermal back relaxation of **SG12**, **SG13**, **SG14** and **SG15** with respect to different intervals of time, respectively.

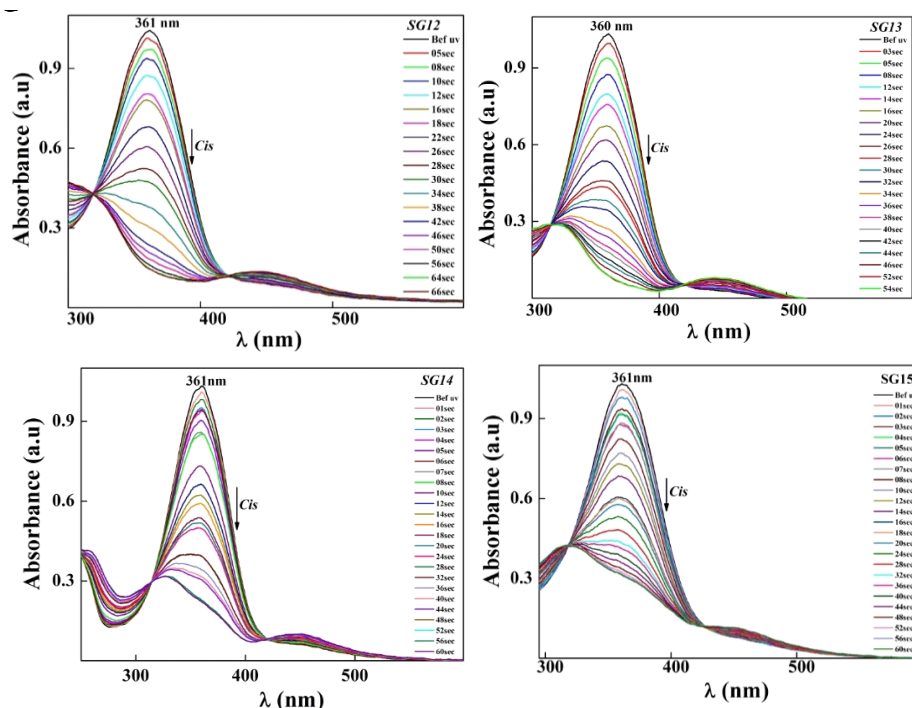

**Fig. S1** Time dependent absorption spectra recorded during UV illumination: a) **SG12**, b) **SG13**, c) **SG14** and d) **SG15** with different intervals of UV irradiation time.

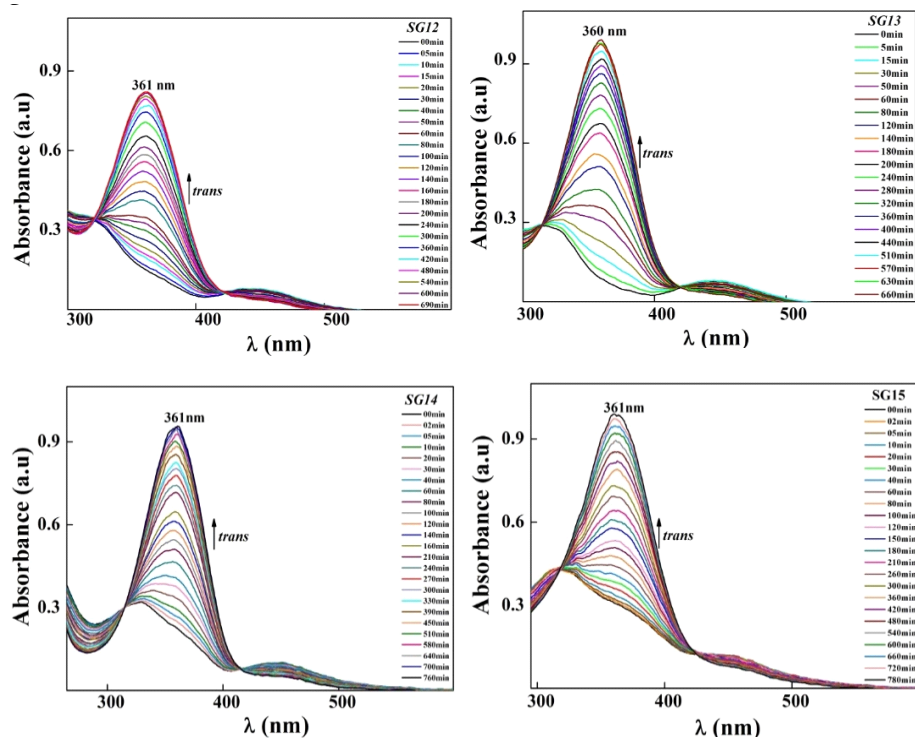

**Fig. S2** Time dependent absorption spectra recorded during thermal back relaxation: a) **SG12**, b) **SG13**, c) **SG14** and d) **SG15** with different intervals of recovery time.

## 2. FT-IR spectra of inter- and intramolecular H-bonding.

Fig.S3 shows illustrative FT-IR spectra corresponds to inter- and intramolecular H-bonding of compound SG11 and SG14, respectively. Spectra were recorded in solution at different concentration using  $\text{CHCl}_3$  as a solvent.

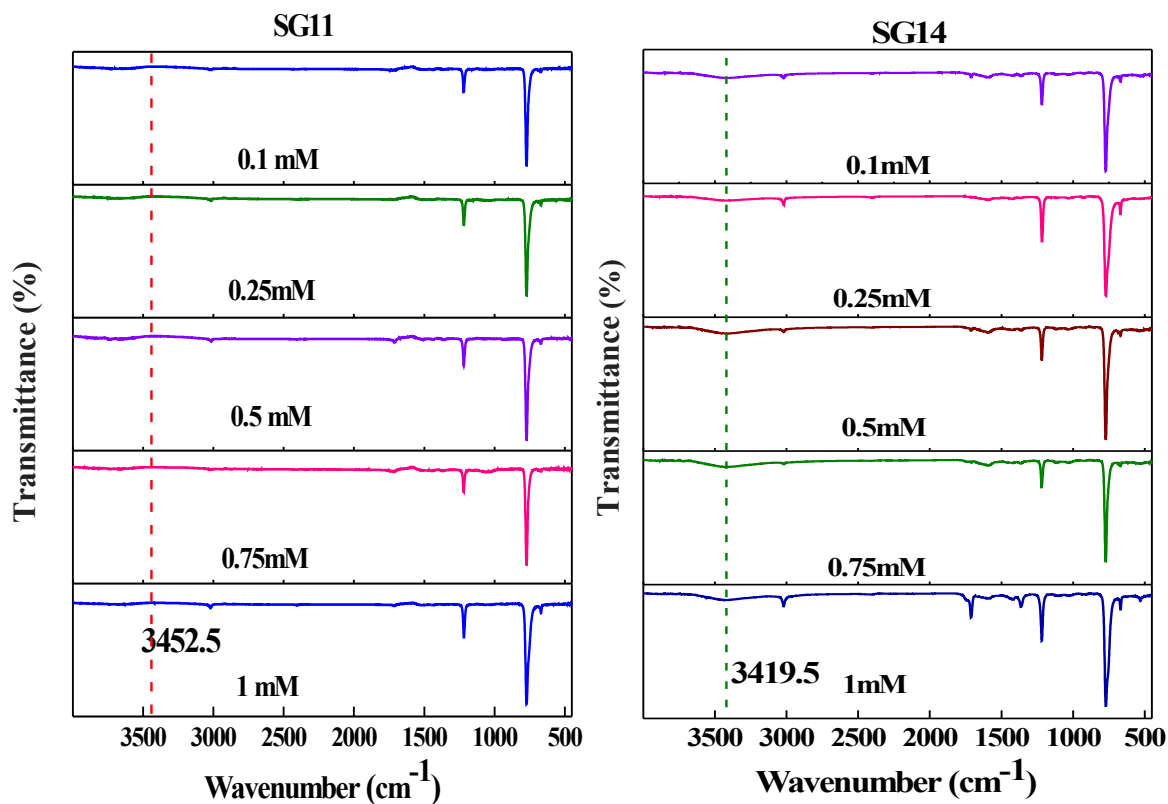

**Fig. S3** FT-IR spectra for **SG11** and **SG14** showing inter- and intramolecular H-bonding, respectively. Spectra were recorded in solution at different concentrations using  $\text{CHCl}_3$  as solvent.

### 3. FT-IR and $^1\text{H}$ NMR spectra

The IR values of compounds were measured using KBr pellet method in Perkin Elmer FT-IR spectrometer. Fig. S4 represents FT-IR spectra of **SG11**, **SG12**, **SG13**, **SG14** and **SG15**.  $^1\text{H}$  NMR spectrum for final compounds spectra were recorded on a 400 MHz Bruker NMR spectrometer, using  $\text{CDCl}_3$  as a solvent and their respective spectra are given below (Fig. S5- Fig. S9).

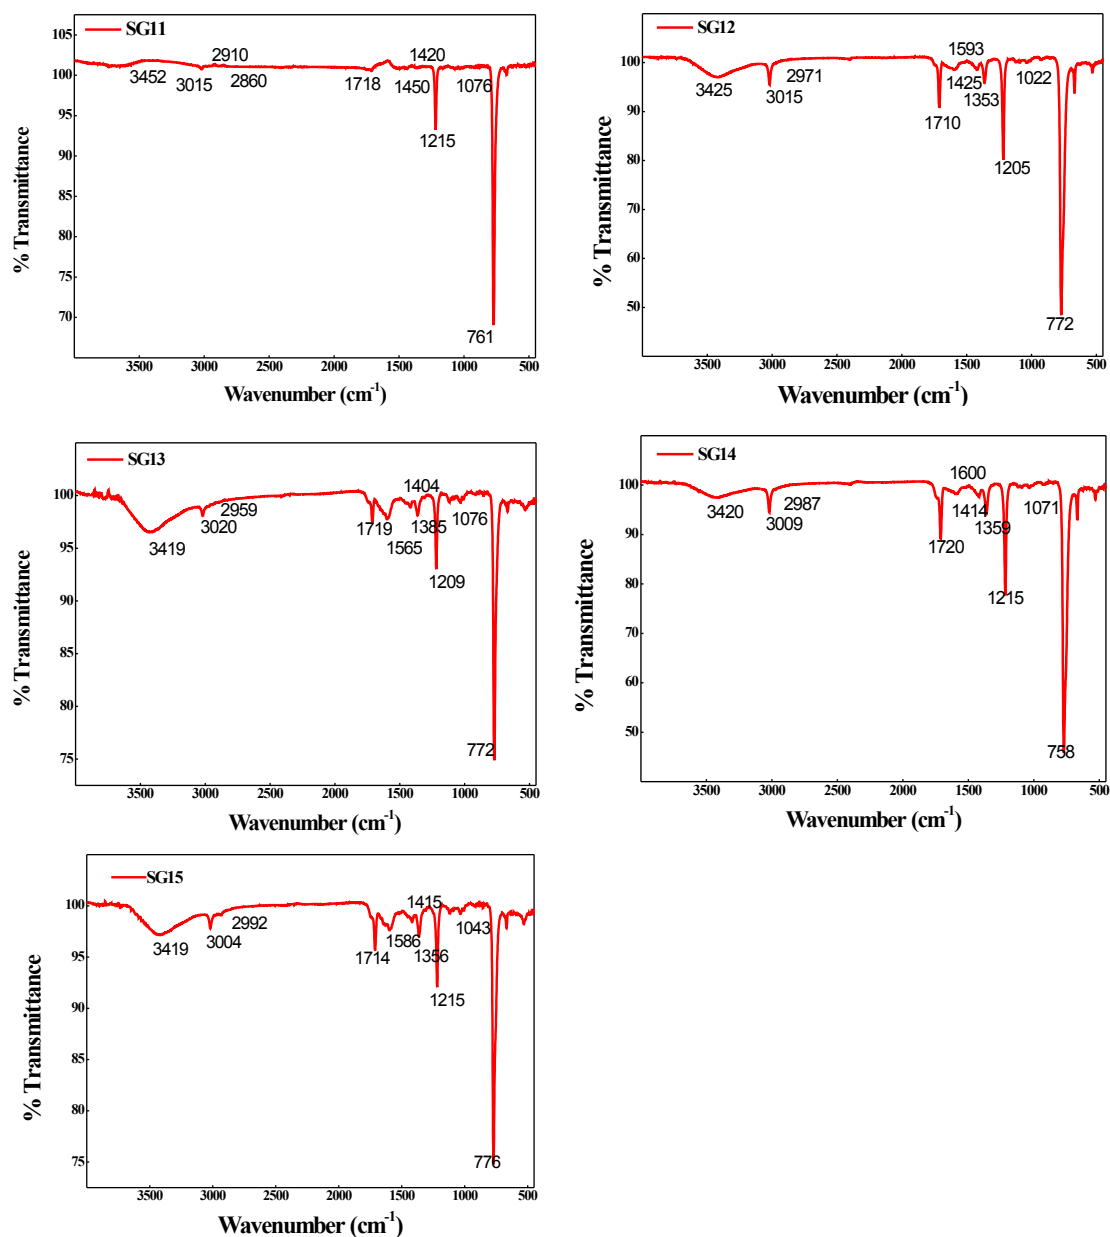

**Fig. S4** FT-IR spectrum for final compounds such as **SG11**, **SG12**, **SG13**, **SG14** and **SG15**.

20200224-BMS  
SG-11

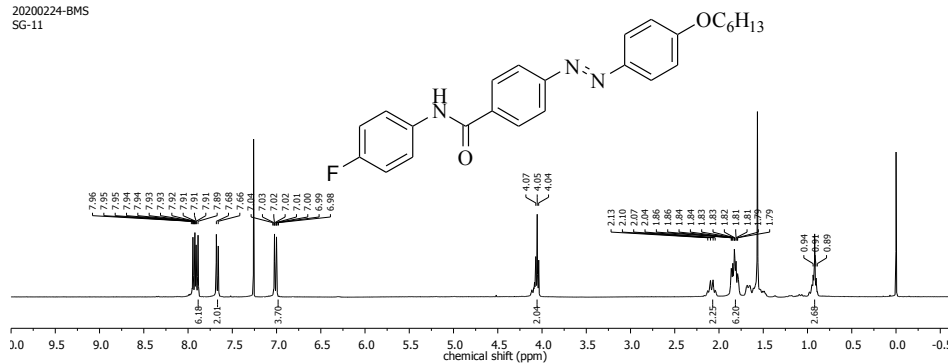

**Fig. S5** <sup>1</sup>H NMR spectrum for **SG11** (400 MHz, CDCl<sub>3</sub>).

20200224-BMS  
SG-12

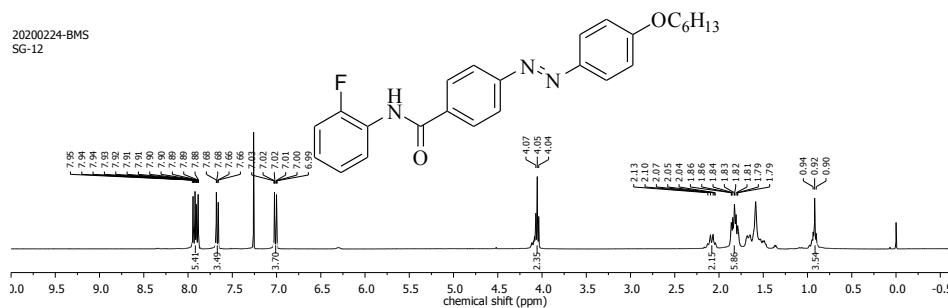

**Fig. S6** <sup>1</sup>H NMR spectrum for **SG12** (400 MHz, CDCl<sub>3</sub>).

20200224-BMS  
SG-13

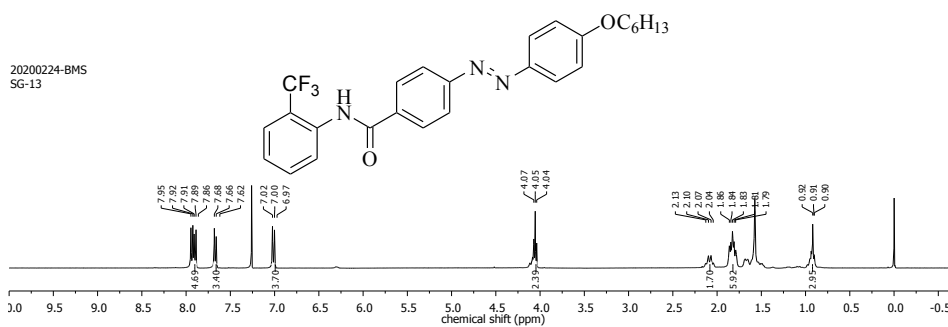

**Fig. S7** <sup>1</sup>H NMR spectrum for **SG13** (400 MHz, CDCl<sub>3</sub>).

20200224-BMS  
SG-14

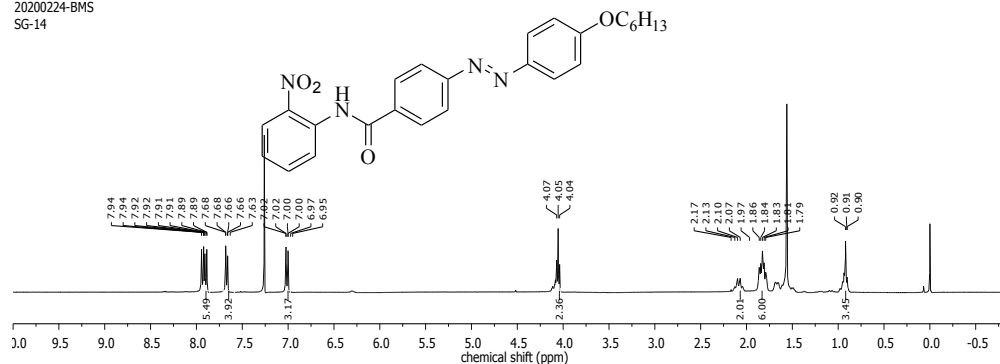

**Fig. S8** <sup>1</sup>H NMR spectrum for **SG14** (400 MHz, CDCl<sub>3</sub>).

20200224-BMS  
SG-15

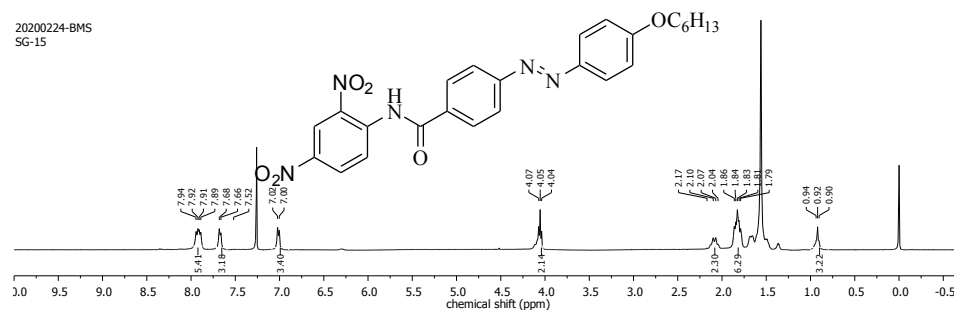

**Fig. S9** <sup>1</sup>H NMR spectrum for **SG15** (400 MHz, CDCl<sub>3</sub>).
